# Supplementary material for: Evaluation of immunostimulatory potential of synthetic TLR2 agonists in chicken
Source: Research Square preprint supplement (doi:10.21203/rs.3.rs-7833167/v1), 2025-11-05
Supplement: Supplementary file 1 [file ca958556ce95bd3bd265f936.docx]

**Evaluation of immunostimulatory potential of synthetic TLR2 agonists in chicken**

Maramreddy Darshini1, Saravanan Ramakrishnan1*, Firdous Ahmed1, Deshkanwar S Brar2, Arshpreet Kaur3, Deepak B. Salunke4*, Vishal Chander5and Mithilesh Singh1*

1Immunology Section, ICAR-Indian Veterinary Research Institute, Izatnagar Bareilly-243122 India.

2Department of Chemistry and Centre of Advanced Studies in Chemistry, Panjab University, Chandigarh 160014, India.

3National Interdisciplinary Centre of Vaccine Immunotherapeutics and Antimicrobials, Panjab University, Chandigarh 160014, India.

4Department of Medicinal Chemistry, National Institute of Pharmaceutical Education and Research, Sector 67, S. A. S. Nagar, Mohali, 160 062, Punjab, India

5Division of Virology, ICAR-Indian Veterinary Research Institute, Mukteswar-243122 India.

Corresponding Authors

Mithilesh Singh; E-mail: [drmithileshsingh@yahoo.com](mailto:drmithileshsingh@yahoo.com)

Saravanan Ramakrishnan, E-mail: [dearsaromib@yahoo.com](mailto:dearsaromib@yahoo.com)

Deepak B. Salunke,, E-mail: [deepsalunke@gmail.com](mailto:deepsalunke@gmail.com)

1. **Experiment Section**
   1. **Synthesis of TLR2 Agonists**

**Scheme 1.** Synthesis of P7a

**aReagents and conditions:** (i) Succinic anhydride, Et3N, anhyd. THF, 55 ℃, 3h.

To a solution of (7*S*,10*R*,14*S*)-10-acetamido-7-(methoxycarbonyl)-4,9,17-trioxo-14-(palmitoyloxy)-5,16-dioxa-12-thia-8-azadotriacontanoic acid(**P6**,50 mg, 0.06 mmol) in anhyd. THF (4 mL) were added succinic anhydride (12.3 mg, 0.12 mmol) and Et3N (17 µL). The reaction mixture was stirred at 55 °C for 2 h. After completion of the reaction, the solvent was evaporated under reduced pressure and the residue obtained was dissolved in ethyl acetate (10 mL). The organic layer was washed with 1M aq. HCl (10 mL x 1), brine (10 mL × 2) and dried over anhydrous Na2SO4.  Evaporation of the organic layer under reduced pressure resulted in a crude product, which was purified using column chromatography (4% MeOH/DCM) to obtain compound **P7** as a white solid (53 mg, 94%). **1H NMR** (500 MHz, CDCl3): δ 7.39 (d, *J* = 8.1 Hz, 1H), 6.92 (d, *J* = 8.3 Hz, 1H), 5.17 (tt, *J* = 6.5, 3.1 Hz, 1H), 4.87 – 4.79 (m, 2H), 4.67 (dd, *J* = 11.4, 3.5 Hz, 1H), 4.38 (dt, *J* = 11.9, 3.3 Hz, 2H), 4.17 (dd, *J* = 12.0, 6.3 Hz, 1H), 3.79 (s, 3H), 3.03 (dd, *J* = 14.0, 5.6 Hz, 1H), 2.87 (dd, *J* = 14.1, 7.1 Hz, 1H), 2.76 (dd, *J* = 6.6, 1.6 Hz, 2H), 2.73 – 2.51 (m, 4H), 2.37 – 2.26 (m, 4H), 2.08 (s, 3H), 1.70 – 1.54 (m, 4H), 1.25 (s, 46H), 0.87 (t, *J* = 7.0 Hz, 6H). **13C NMR** (126 MHz, CDCl3): δ 175.2, 174.0, 173.8, 171.91, 171.87, 170.3, 169.4, 70.5, 63.8, 63.2, 53.1, 52.1, 34.8, 34.5, 34.3, 32.13, 32.09, 29.84, 29.79, 29.7, 29.65, 29.63, 29.5, 29.43, 29.37, 29.28, 29.25, 25.02, 25.00, 23.2, 22.8, 14.2. **ESI-MS:** m/zCalc’d C48H87N2O12S+(M+H)+ = 915.5974, found 915.5949

**Note:** **P6** was synthesized according to the procedure we reported recently (Kaur et al. 2022)

- 1. **NMR Spectra for TLR2 Agonists**

| **1H NMR** (500 MHz, CDCl3) of **P6** |
| --- |
| **P6** |
| **13C{1H} NMR** (126 MHz, CDCl3) of **P6** |
| **P6** |
| **ESI-MS** of **P6** |
| **P6**  **(M+H)+ = 915.5974** |

**References**

Kaur A, Piplani S, Kaushik D,Fung J, Sakala I, Honda-Okubo Y, Mehta S, Petrovsky N, Salunke D (2022). Stereoisomeric Pam2CS based TLR2 agonists: synthesis, structural modelling and activity as vaccine adjuvants. RSC Med Chem 5:622–637. https://doi: 10.1039/d1md00372k.
